# Supplementary material for: Impact of Colonoscopy Bowel Preparation on Intestinal Microbiota
Source: PLoS One. 2013 May 1;8(5):e62815. doi: 10.1371/journal.pone.0062815 (PMC3641102; doi:10.1371/journal.pone.0062815)
Supplement: Dataset S1 — All sff files generated by the 454 Genome Sequencer, their associated metadata, and primer sequences are available via the following link: https://datacommons.anu.edu.au:8443/DataCommons/item/anudc:4896. (XLSX) [file pone.0062815.s001.xlsx]

## Sheet: Sheet1
Sample			2 -1m	2 -1w	2 +3m	3 -1m	3 -1w	3 +1w	4 -1m	4 -1w	4 +1w	5 -1m	5 -1w	5 +3m	7 -1m	7 -1w	7 +3m	8 -1m	8 -1w	8 +1w	9 -1m	9 -1w	9 +1m	11 -1m	11 -1w	11 +1w	13 -1m	13 -1w	13 +1m	15 -1m	15 -1w	15 +1w	A	A +3m	B	B +3m	C	C +3m	H	H +3m	W	W +3m
	INSDC name of field	Units
Investigation
Investigation type	investigation_type		16S meatgenomics	16S meatgenomics	16S meatgenomics	16S meatgenomics	16S meatgenomics	16S meatgenomics	16S meatgenomics	16S meatgenomics	16S meatgenomics	16S meatgenomics	16S meatgenomics	16S meatgenomics	16S meatgenomics	16S meatgenomics	16S meatgenomics	16S meatgenomics	16S meatgenomics	16S meatgenomics	16S meatgenomics	16S meatgenomics	16S meatgenomics	16S meatgenomics	16S meatgenomics	16S meatgenomics	16S meatgenomics	16S meatgenomics	16S meatgenomics	16S meatgenomics	16S meatgenomics	16S meatgenomics	16S meatgenomics	16S meatgenomics	16S meatgenomics	16S meatgenomics	16S meatgenomics	16S meatgenomics	16S meatgenomics	16S meatgenomics	16S meatgenomics	16S meatgenomics
Project name	project_name		Impact of colonoscopy bowel preparation on intestinal microbiota	Impact of colonoscopy bowel preparation on intestinal microbiota	Impact of colonoscopy bowel preparation on intestinal microbiota	Impact of colonoscopy bowel preparation on intestinal microbiota	Impact of colonoscopy bowel preparation on intestinal microbiota	Impact of colonoscopy bowel preparation on intestinal microbiota	Impact of colonoscopy bowel preparation on intestinal microbiota	Impact of colonoscopy bowel preparation on intestinal microbiota	Impact of colonoscopy bowel preparation on intestinal microbiota	Impact of colonoscopy bowel preparation on intestinal microbiota	Impact of colonoscopy bowel preparation on intestinal microbiota	Impact of colonoscopy bowel preparation on intestinal microbiota	Impact of colonoscopy bowel preparation on intestinal microbiota	Impact of colonoscopy bowel preparation on intestinal microbiota	Impact of colonoscopy bowel preparation on intestinal microbiota	Impact of colonoscopy bowel preparation on intestinal microbiota	Impact of colonoscopy bowel preparation on intestinal microbiota	Impact of colonoscopy bowel preparation on intestinal microbiota	Impact of colonoscopy bowel preparation on intestinal microbiota	Impact of colonoscopy bowel preparation on intestinal microbiota	Impact of colonoscopy bowel preparation on intestinal microbiota	Impact of colonoscopy bowel preparation on intestinal microbiota	Impact of colonoscopy bowel preparation on intestinal microbiota	Impact of colonoscopy bowel preparation on intestinal microbiota	Impact of colonoscopy bowel preparation on intestinal microbiota	Impact of colonoscopy bowel preparation on intestinal microbiota	Impact of colonoscopy bowel preparation on intestinal microbiota	Impact of colonoscopy bowel preparation on intestinal microbiota	Impact of colonoscopy bowel preparation on intestinal microbiota	Impact of colonoscopy bowel preparation on intestinal microbiota	Impact of colonoscopy bowel preparation on intestinal microbiota	Impact of colonoscopy bowel preparation on intestinal microbiota	Impact of colonoscopy bowel preparation on intestinal microbiota	Impact of colonoscopy bowel preparation on intestinal microbiota	Impact of colonoscopy bowel preparation on intestinal microbiota	Impact of colonoscopy bowel preparation on intestinal microbiota	Impact of colonoscopy bowel preparation on intestinal microbiota	Impact of colonoscopy bowel preparation on intestinal microbiota	Impact of colonoscopy bowel preparation on intestinal microbiota	Impact of colonoscopy bowel preparation on intestinal microbiota
Collection date	collection_date		10/03/2008-19/12/2008	10/03/2008-19/12/2009	10/03/2008-19/12/2010	10/03/2008-19/12/2011	10/03/2008-19/12/2012	10/03/2008-19/12/2013	10/03/2008-19/12/2014	10/03/2008-19/12/2015	10/03/2008-19/12/2016	10/03/2008-19/12/2017	10/03/2008-19/12/2018	10/03/2008-19/12/2019	10/03/2008-19/12/2020	10/03/2008-19/12/2021	10/03/2008-19/12/2022	10/03/2008-19/12/2023	10/03/2008-19/12/2024	10/03/2008-19/12/2025	10/03/2008-19/12/2026	10/03/2008-19/12/2027	10/03/2008-19/12/2028	10/03/2008-19/12/2029	10/03/2008-19/12/2030	10/03/2008-19/12/2031	10/03/2008-19/12/2032	10/03/2008-19/12/2033	10/03/2008-19/12/2034	10/03/2008-19/12/2035	10/03/2008-19/12/2036	10/03/2008-19/12/2037	10/03/2008-19/12/2038	10/03/2008-19/12/2039	10/03/2008-19/12/2040	10/03/2008-19/12/2041	10/03/2008-19/12/2042	10/03/2008-19/12/2043	10/03/2008-19/12/2044	10/03/2008-19/12/2045	10/03/2008-19/12/2046	10/03/2008-19/12/2047
Environment (biome)	biome		Human gut	Human gut	Human gut	Human gut	Human gut	Human gut	Human gut	Human gut	Human gut	Human gut	Human gut	Human gut	Human gut	Human gut	Human gut	Human gut	Human gut	Human gut	Human gut	Human gut	Human gut	Human gut	Human gut	Human gut	Human gut	Human gut	Human gut	Human gut	Human gut	Human gut	Human gut	Human gut	Human gut	Human gut	Human gut	Human gut	Human gut	Human gut	Human gut	Human gut
Environment (material)	material		Faecal	Faecal	Faecal	Faecal	Faecal	Faecal	Faecal	Faecal	Faecal	Faecal	Faecal	Faecal	Faecal	Faecal	Faecal	Faecal	Faecal	Faecal	Faecal	Faecal	Faecal	Faecal	Faecal	Faecal	Faecal	Faecal	Faecal	Faecal	Faecal	Faecal	Faecal	Faecal	Faecal	Faecal	Faecal	Faecal	Faecal	Faecal	Faecal	Faecal
Sample collection device or method	samp_collect_device		Sampled with sterile faecal scoop and jar, frozen immediately at -20°C, transfered to hospital and frozen at -80°C	Sampled with sterile faecal scoop and jar, frozen immediately at -20°C, transfered to hospital and frozen at -80°C	Sampled with sterile faecal scoop and jar, frozen immediately at -20°C, transfered to hospital and frozen at -80°C	Sampled with sterile faecal scoop and jar, frozen immediately at -20°C, transfered to hospital and frozen at -80°C	Sampled with sterile faecal scoop and jar, frozen immediately at -20°C, transfered to hospital and frozen at -80°C	Sampled with sterile faecal scoop and jar, frozen immediately at -20°C, transfered to hospital and frozen at -80°C	Sampled with sterile faecal scoop and jar, frozen immediately at -20°C, transfered to hospital and frozen at -80°C	Sampled with sterile faecal scoop and jar, frozen immediately at -20°C, transfered to hospital and frozen at -80°C	Sampled with sterile faecal scoop and jar, frozen immediately at -20°C, transfered to hospital and frozen at -80°C	Sampled with sterile faecal scoop and jar, frozen immediately at -20°C, transfered to hospital and frozen at -80°C	Sampled with sterile faecal scoop and jar, frozen immediately at -20°C, transfered to hospital and frozen at -80°C	Sampled with sterile faecal scoop and jar, frozen immediately at -20°C, transfered to hospital and frozen at -80°C	Sampled with sterile faecal scoop and jar, frozen immediately at -20°C, transfered to hospital and frozen at -80°C	Sampled with sterile faecal scoop and jar, frozen immediately at -20°C, transfered to hospital and frozen at -80°C	Sampled with sterile faecal scoop and jar, frozen immediately at -20°C, transfered to hospital and frozen at -80°C	Sampled with sterile faecal scoop and jar, frozen immediately at -20°C, transfered to hospital and frozen at -80°C	Sampled with sterile faecal scoop and jar, frozen immediately at -20°C, transfered to hospital and frozen at -80°C	Sampled with sterile faecal scoop and jar, frozen immediately at -20°C, transfered to hospital and frozen at -80°C	Sampled with sterile faecal scoop and jar, frozen immediately at -20°C, transfered to hospital and frozen at -80°C	Sampled with sterile faecal scoop and jar, frozen immediately at -20°C, transfered to hospital and frozen at -80°C	Sampled with sterile faecal scoop and jar, frozen immediately at -20°C, transfered to hospital and frozen at -80°C	Sampled with sterile faecal scoop and jar, frozen immediately at -20°C, transfered to hospital and frozen at -80°C	Sampled with sterile faecal scoop and jar, frozen immediately at -20°C, transfered to hospital and frozen at -80°C	Sampled with sterile faecal scoop and jar, frozen immediately at -20°C, transfered to hospital and frozen at -80°C	Sampled with sterile faecal scoop and jar, frozen immediately at -20°C, transfered to hospital and frozen at -80°C	Sampled with sterile faecal scoop and jar, frozen immediately at -20°C, transfered to hospital and frozen at -80°C	Sampled with sterile faecal scoop and jar, frozen immediately at -20°C, transfered to hospital and frozen at -80°C	Sampled with sterile faecal scoop and jar, frozen immediately at -20°C, transfered to hospital and frozen at -80°C	Sampled with sterile faecal scoop and jar, frozen immediately at -20°C, transfered to hospital and frozen at -80°C	Sampled with sterile faecal scoop and jar, frozen immediately at -20°C, transfered to hospital and frozen at -80°C	Sampled with sterile faecal scoop and jar, frozen immediately at -20°C, transfered to hospital and frozen at -80°C	Sampled with sterile faecal scoop and jar, frozen immediately at -20°C, transfered to hospital and frozen at -80°C	Sampled with sterile faecal scoop and jar, frozen immediately at -20°C, transfered to hospital and frozen at -80°C	Sampled with sterile faecal scoop and jar, frozen immediately at -20°C, transfered to hospital and frozen at -80°C	Sampled with sterile faecal scoop and jar, frozen immediately at -20°C, transfered to hospital and frozen at -80°C	Sampled with sterile faecal scoop and jar, frozen immediately at -20°C, transfered to hospital and frozen at -80°C	Sampled with sterile faecal scoop and jar, frozen immediately at -20°C, transfered to hospital and frozen at -80°C	Sampled with sterile faecal scoop and jar, frozen immediately at -20°C, transfered to hospital and frozen at -80°C	Sampled with sterile faecal scoop and jar, frozen immediately at -20°C, transfered to hospital and frozen at -80°C	Sampled with sterile faecal scoop and jar, frozen immediately at -20°C, transfered to hospital and frozen at -80°C
Sample material processing	samp_mat_process		8 sites of stool sample combined and homogenised, as preliminary validation studies suggested this was best to get a representative sample	9 sites of stool sample combined and homogenised, as preliminary validation studies suggested this was best to get a representative sample	10 sites of stool sample combined and homogenised, as preliminary validation studies suggested this was best to get a representative sample	11 sites of stool sample combined and homogenised, as preliminary validation studies suggested this was best to get a representative sample	12 sites of stool sample combined and homogenised, as preliminary validation studies suggested this was best to get a representative sample	13 sites of stool sample combined and homogenised, as preliminary validation studies suggested this was best to get a representative sample	14 sites of stool sample combined and homogenised, as preliminary validation studies suggested this was best to get a representative sample	15 sites of stool sample combined and homogenised, as preliminary validation studies suggested this was best to get a representative sample	16 sites of stool sample combined and homogenised, as preliminary validation studies suggested this was best to get a representative sample	17 sites of stool sample combined and homogenised, as preliminary validation studies suggested this was best to get a representative sample	18 sites of stool sample combined and homogenised, as preliminary validation studies suggested this was best to get a representative sample	19 sites of stool sample combined and homogenised, as preliminary validation studies suggested this was best to get a representative sample	20 sites of stool sample combined and homogenised, as preliminary validation studies suggested this was best to get a representative sample	21 sites of stool sample combined and homogenised, as preliminary validation studies suggested this was best to get a representative sample	22 sites of stool sample combined and homogenised, as preliminary validation studies suggested this was best to get a representative sample	23 sites of stool sample combined and homogenised, as preliminary validation studies suggested this was best to get a representative sample	24 sites of stool sample combined and homogenised, as preliminary validation studies suggested this was best to get a representative sample	25 sites of stool sample combined and homogenised, as preliminary validation studies suggested this was best to get a representative sample	26 sites of stool sample combined and homogenised, as preliminary validation studies suggested this was best to get a representative sample	27 sites of stool sample combined and homogenised, as preliminary validation studies suggested this was best to get a representative sample	28 sites of stool sample combined and homogenised, as preliminary validation studies suggested this was best to get a representative sample	29 sites of stool sample combined and homogenised, as preliminary validation studies suggested this was best to get a representative sample	30 sites of stool sample combined and homogenised, as preliminary validation studies suggested this was best to get a representative sample	31 sites of stool sample combined and homogenised, as preliminary validation studies suggested this was best to get a representative sample	32 sites of stool sample combined and homogenised, as preliminary validation studies suggested this was best to get a representative sample	33 sites of stool sample combined and homogenised, as preliminary validation studies suggested this was best to get a representative sample	34 sites of stool sample combined and homogenised, as preliminary validation studies suggested this was best to get a representative sample	35 sites of stool sample combined and homogenised, as preliminary validation studies suggested this was best to get a representative sample	36 sites of stool sample combined and homogenised, as preliminary validation studies suggested this was best to get a representative sample	37 sites of stool sample combined and homogenised, as preliminary validation studies suggested this was best to get a representative sample	38 sites of stool sample combined and homogenised, as preliminary validation studies suggested this was best to get a representative sample	39 sites of stool sample combined and homogenised, as preliminary validation studies suggested this was best to get a representative sample	40 sites of stool sample combined and homogenised, as preliminary validation studies suggested this was best to get a representative sample	41 sites of stool sample combined and homogenised, as preliminary validation studies suggested this was best to get a representative sample	42 sites of stool sample combined and homogenised, as preliminary validation studies suggested this was best to get a representative sample	43 sites of stool sample combined and homogenised, as preliminary validation studies suggested this was best to get a representative sample	44 sites of stool sample combined and homogenised, as preliminary validation studies suggested this was best to get a representative sample	45 sites of stool sample combined and homogenised, as preliminary validation studies suggested this was best to get a representative sample	46 sites of stool sample combined and homogenised, as preliminary validation studies suggested this was best to get a representative sample	47 sites of stool sample combined and homogenised, as preliminary validation studies suggested this was best to get a representative sample
Amount or size of sample collected	samp_size	grams	walnut size (~50 g)	walnut size (~50 g)	walnut size (~50 g)	walnut size (~50 g)	walnut size (~50 g)	walnut size (~50 g)	walnut size (~50 g)	walnut size (~50 g)	walnut size (~50 g)	walnut size (~50 g)	walnut size (~50 g)	walnut size (~50 g)	walnut size (~50 g)	walnut size (~50 g)	walnut size (~50 g)	walnut size (~50 g)	walnut size (~50 g)	walnut size (~50 g)	walnut size (~50 g)	walnut size (~50 g)	walnut size (~50 g)	walnut size (~50 g)	walnut size (~50 g)	walnut size (~50 g)	walnut size (~50 g)	walnut size (~50 g)	walnut size (~50 g)	walnut size (~50 g)	walnut size (~50 g)	walnut size (~50 g)	walnut size (~50 g)	walnut size (~50 g)	walnut size (~50 g)	walnut size (~50 g)	walnut size (~50 g)	walnut size (~50 g)	walnut size (~50 g)	walnut size (~50 g)	walnut size (~50 g)	walnut size (~50 g)
Sequencing
Nucleic acid extraction	nucl_acid_ext		Qiagen Stool kits	Qiagen Stool kits	Qiagen Stool kits	Qiagen Stool kits	Qiagen Stool kits	Qiagen Stool kits	Qiagen Stool kits	Qiagen Stool kits	Qiagen Stool kits	Qiagen Stool kits	Qiagen Stool kits	Qiagen Stool kits	Qiagen Stool kits	Qiagen Stool kits	Qiagen Stool kits	Qiagen Stool kits	Qiagen Stool kits	Qiagen Stool kits	Qiagen Stool kits	Qiagen Stool kits	Qiagen Stool kits	Qiagen Stool kits	Qiagen Stool kits	Qiagen Stool kits	Qiagen Stool kits	Qiagen Stool kits	Qiagen Stool kits	Qiagen Stool kits	Qiagen Stool kits	Qiagen Stool kits	Qiagen Stool kits	Qiagen Stool kits	Qiagen Stool kits	Qiagen Stool kits	Qiagen Stool kits	Qiagen Stool kits	Qiagen Stool kits	Qiagen Stool kits	Qiagen Stool kits	Qiagen Stool kits
Nucleic acid amplification	nucl_acid_amp		Invitrogen High Fidelity enzyme	Invitrogen High Fidelity enzyme	Invitrogen High Fidelity enzyme	Invitrogen High Fidelity enzyme	Invitrogen High Fidelity enzyme	Invitrogen High Fidelity enzyme	Invitrogen High Fidelity enzyme	Invitrogen High Fidelity enzyme	Invitrogen High Fidelity enzyme	Invitrogen High Fidelity enzyme	Invitrogen High Fidelity enzyme	Invitrogen High Fidelity enzyme	Invitrogen High Fidelity enzyme	Invitrogen High Fidelity enzyme	Invitrogen High Fidelity enzyme	Invitrogen High Fidelity enzyme	Invitrogen High Fidelity enzyme	Invitrogen High Fidelity enzyme	Invitrogen High Fidelity enzyme	Invitrogen High Fidelity enzyme	Invitrogen High Fidelity enzyme	Invitrogen High Fidelity enzyme	Invitrogen High Fidelity enzyme	Invitrogen High Fidelity enzyme	Invitrogen High Fidelity enzyme	Invitrogen High Fidelity enzyme	Invitrogen High Fidelity enzyme	Invitrogen High Fidelity enzyme	Invitrogen High Fidelity enzyme	Invitrogen High Fidelity enzyme	Invitrogen High Fidelity enzyme	Invitrogen High Fidelity enzyme	Invitrogen High Fidelity enzyme	Invitrogen High Fidelity enzyme	Invitrogen High Fidelity enzyme	Invitrogen High Fidelity enzyme	Invitrogen High Fidelity enzyme	Invitrogen High Fidelity enzyme	Invitrogen High Fidelity enzyme	Invitrogen High Fidelity enzyme
Library reads sequenced	lib_reads_seqd		16395	9028	13442	6548	8729	7988	5887	8525	6700	8794	9071	8830	9914	8842	12470	901	9240	6505	8540	8666	5882	9081	4817	10114	11892	11634	9829	10265	12091	8683	2256	554	8077	7659	1801	10951	4289	6551	6617	4116
Target gene	target_gene		16S rRNA	16S rRNA	16S rRNA	16S rRNA	16S rRNA	16S rRNA	16S rRNA	16S rRNA	16S rRNA	16S rRNA	16S rRNA	16S rRNA	16S rRNA	16S rRNA	16S rRNA	16S rRNA	16S rRNA	16S rRNA	16S rRNA	16S rRNA	16S rRNA	16S rRNA	16S rRNA	16S rRNA	16S rRNA	16S rRNA	16S rRNA	16S rRNA	16S rRNA	16S rRNA	16S rRNA	16S rRNA	16S rRNA	16S rRNA	16S rRNA	16S rRNA	16S rRNA	16S rRNA	16S rRNA	16S rRNA
Subfragment	subfragment		V1-V3	V1-V3	V1-V3	V1-V3	V1-V3	V1-V3	V1-V3	V1-V3	V1-V3	V1-V3	V1-V3	V1-V3	V1-V3	V1-V3	V1-V3	V1-V3	V1-V3	V1-V3	V1-V3	V1-V3	V1-V3	V1-V3	V1-V3	V1-V3	V1-V3	V1-V3	V1-V3	V1-V3	V1-V3	V1-V3	V1-V3	V1-V3	V1-V3	V1-V3	V1-V3	V1-V3	V1-V3	V1-V3	V1-V3	V1-V3
PCR primers	pcr_primers		FWD:CCA TCT CAT CCC TGC GTG TCT CCG ACT CAG CCA ACC AAG AGT TTG ATC MTG GCT CAG REV: CCT ATC CCC TGT GTG CCT TGG CAG TCT CAG WTT ACC GCG GCT GCT GG	FWD:CCA TCT CAT CCC TGC GTG TCT CCG ACT CAG CCA ACC AAG AGT TTG ATC MTG GCT CAG REV: CCT ATC CCC TGT GTG CCT TGG CAG TCT CAG WTT ACC GCG GCT GCT GG	FWD:CCA TCT CAT CCC TGC GTG TCT CCG ACT CAG CCA ACC AAG AGT TTG ATC MTG GCT CAG REV: CCT ATC CCC TGT GTG CCT TGG CAG TCT CAG WTT ACC GCG GCT GCT GG	FWD:CCA TCT CAT CCC TGC GTG TCT CCG ACT CAG CCA ACC AAG AGT TTG ATC MTG GCT CAG REV: CCT ATC CCC TGT GTG CCT TGG CAG TCT CAG WTT ACC GCG GCT GCT GG	FWD:CCA TCT CAT CCC TGC GTG TCT CCG ACT CAG CCA ACC AAG AGT TTG ATC MTG GCT CAG REV: CCT ATC CCC TGT GTG CCT TGG CAG TCT CAG WTT ACC GCG GCT GCT GG	FWD:CCA TCT CAT CCC TGC GTG TCT CCG ACT CAG CCA ACC AAG AGT TTG ATC MTG GCT CAG REV: CCT ATC CCC TGT GTG CCT TGG CAG TCT CAG WTT ACC GCG GCT GCT GG	FWD:CCA TCT CAT CCC TGC GTG TCT CCG ACT CAG CCA ACC AAG AGT TTG ATC MTG GCT CAG REV: CCT ATC CCC TGT GTG CCT TGG CAG TCT CAG WTT ACC GCG GCT GCT GG	FWD:CCA TCT CAT CCC TGC GTG TCT CCG ACT CAG CCA ACC AAG AGT TTG ATC MTG GCT CAG REV: CCT ATC CCC TGT GTG CCT TGG CAG TCT CAG WTT ACC GCG GCT GCT GG	FWD:CCA TCT CAT CCC TGC GTG TCT CCG ACT CAG CCA ACC AAG AGT TTG ATC MTG GCT CAG REV: CCT ATC CCC TGT GTG CCT TGG CAG TCT CAG WTT ACC GCG GCT GCT GG	FWD:CCA TCT CAT CCC TGC GTG TCT CCG ACT CAG CCA ACC AAG AGT TTG ATC MTG GCT CAG REV: CCT ATC CCC TGT GTG CCT TGG CAG TCT CAG WTT ACC GCG GCT GCT GG	FWD:CCA TCT CAT CCC TGC GTG TCT CCG ACT CAG CCA ACC AAG AGT TTG ATC MTG GCT CAG REV: CCT ATC CCC TGT GTG CCT TGG CAG TCT CAG WTT ACC GCG GCT GCT GG	FWD:CCA TCT CAT CCC TGC GTG TCT CCG ACT CAG CCA ACC AAG AGT TTG ATC MTG GCT CAG REV: CCT ATC CCC TGT GTG CCT TGG CAG TCT CAG WTT ACC GCG GCT GCT GG	FWD:CCA TCT CAT CCC TGC GTG TCT CCG ACT CAG CCA ACC AAG AGT TTG ATC MTG GCT CAG REV: CCT ATC CCC TGT GTG CCT TGG CAG TCT CAG WTT ACC GCG GCT GCT GG	FWD:CCA TCT CAT CCC TGC GTG TCT CCG ACT CAG CCA ACC AAG AGT TTG ATC MTG GCT CAG REV: CCT ATC CCC TGT GTG CCT TGG CAG TCT CAG WTT ACC GCG GCT GCT GG	FWD:CCA TCT CAT CCC TGC GTG TCT CCG ACT CAG CCA ACC AAG AGT TTG ATC MTG GCT CAG REV: CCT ATC CCC TGT GTG CCT TGG CAG TCT CAG WTT ACC GCG GCT GCT GG	FWD:CCA TCT CAT CCC TGC GTG TCT CCG ACT CAG CCA ACC AAG AGT TTG ATC MTG GCT CAG REV: CCT ATC CCC TGT GTG CCT TGG CAG TCT CAG WTT ACC GCG GCT GCT GG	FWD:CCA TCT CAT CCC TGC GTG TCT CCG ACT CAG CCA ACC AAG AGT TTG ATC MTG GCT CAG REV: CCT ATC CCC TGT GTG CCT TGG CAG TCT CAG WTT ACC GCG GCT GCT GG	FWD:CCA TCT CAT CCC TGC GTG TCT CCG ACT CAG CCA ACC AAG AGT TTG ATC MTG GCT CAG REV: CCT ATC CCC TGT GTG CCT TGG CAG TCT CAG WTT ACC GCG GCT GCT GG	FWD:CCA TCT CAT CCC TGC GTG TCT CCG ACT CAG CCA ACC AAG AGT TTG ATC MTG GCT CAG REV: CCT ATC CCC TGT GTG CCT TGG CAG TCT CAG WTT ACC GCG GCT GCT GG	FWD:CCA TCT CAT CCC TGC GTG TCT CCG ACT CAG CCA ACC AAG AGT TTG ATC MTG GCT CAG REV: CCT ATC CCC TGT GTG CCT TGG CAG TCT CAG WTT ACC GCG GCT GCT GG	FWD:CCA TCT CAT CCC TGC GTG TCT CCG ACT CAG CCA ACC AAG AGT TTG ATC MTG GCT CAG REV: CCT ATC CCC TGT GTG CCT TGG CAG TCT CAG WTT ACC GCG GCT GCT GG	FWD:CCA TCT CAT CCC TGC GTG TCT CCG ACT CAG CCA ACC AAG AGT TTG ATC MTG GCT CAG REV: CCT ATC CCC TGT GTG CCT TGG CAG TCT CAG WTT ACC GCG GCT GCT GG	FWD:CCA TCT CAT CCC TGC GTG TCT CCG ACT CAG CCA ACC AAG AGT TTG ATC MTG GCT CAG REV: CCT ATC CCC TGT GTG CCT TGG CAG TCT CAG WTT ACC GCG GCT GCT GG	FWD:CCA TCT CAT CCC TGC GTG TCT CCG ACT CAG CCA ACC AAG AGT TTG ATC MTG GCT CAG REV: CCT ATC CCC TGT GTG CCT TGG CAG TCT CAG WTT ACC GCG GCT GCT GG	FWD:CCA TCT CAT CCC TGC GTG TCT CCG ACT CAG CCA ACC AAG AGT TTG ATC MTG GCT CAG REV: CCT ATC CCC TGT GTG CCT TGG CAG TCT CAG WTT ACC GCG GCT GCT GG	FWD:CCA TCT CAT CCC TGC GTG TCT CCG ACT CAG CCA ACC AAG AGT TTG ATC MTG GCT CAG REV: CCT ATC CCC TGT GTG CCT TGG CAG TCT CAG WTT ACC GCG GCT GCT GG	FWD:CCA TCT CAT CCC TGC GTG TCT CCG ACT CAG CCA ACC AAG AGT TTG ATC MTG GCT CAG REV: CCT ATC CCC TGT GTG CCT TGG CAG TCT CAG WTT ACC GCG GCT GCT GG	FWD:CCA TCT CAT CCC TGC GTG TCT CCG ACT CAG CCA ACC AAG AGT TTG ATC MTG GCT CAG REV: CCT ATC CCC TGT GTG CCT TGG CAG TCT CAG WTT ACC GCG GCT GCT GG	FWD:CCA TCT CAT CCC TGC GTG TCT CCG ACT CAG CCA ACC AAG AGT TTG ATC MTG GCT CAG REV: CCT ATC CCC TGT GTG CCT TGG CAG TCT CAG WTT ACC GCG GCT GCT GG	FWD:CCA TCT CAT CCC TGC GTG TCT CCG ACT CAG CCA ACC AAG AGT TTG ATC MTG GCT CAG REV: CCT ATC CCC TGT GTG CCT TGG CAG TCT CAG WTT ACC GCG GCT GCT GG	FWD:CCA TCT CAT CCC TGC GTG TCT CCG ACT CAG CCA ACC AAG AGT TTG ATC MTG GCT CAG REV: CCT ATC CCC TGT GTG CCT TGG CAG TCT CAG WTT ACC GCG GCT GCT GG	FWD:CCA TCT CAT CCC TGC GTG TCT CCG ACT CAG CCA ACC AAG AGT TTG ATC MTG GCT CAG REV: CCT ATC CCC TGT GTG CCT TGG CAG TCT CAG WTT ACC GCG GCT GCT GG	FWD:CCA TCT CAT CCC TGC GTG TCT CCG ACT CAG CCA ACC AAG AGT TTG ATC MTG GCT CAG REV: CCT ATC CCC TGT GTG CCT TGG CAG TCT CAG WTT ACC GCG GCT GCT GG	FWD:CCA TCT CAT CCC TGC GTG TCT CCG ACT CAG CCA ACC AAG AGT TTG ATC MTG GCT CAG REV: CCT ATC CCC TGT GTG CCT TGG CAG TCT CAG WTT ACC GCG GCT GCT GG	FWD:CCA TCT CAT CCC TGC GTG TCT CCG ACT CAG CCA ACC AAG AGT TTG ATC MTG GCT CAG REV: CCT ATC CCC TGT GTG CCT TGG CAG TCT CAG WTT ACC GCG GCT GCT GG	FWD:CCA TCT CAT CCC TGC GTG TCT CCG ACT CAG CCA ACC AAG AGT TTG ATC MTG GCT CAG REV: CCT ATC CCC TGT GTG CCT TGG CAG TCT CAG WTT ACC GCG GCT GCT GG	FWD:CCA TCT CAT CCC TGC GTG TCT CCG ACT CAG CCA ACC AAG AGT TTG ATC MTG GCT CAG REV: CCT ATC CCC TGT GTG CCT TGG CAG TCT CAG WTT ACC GCG GCT GCT GG	FWD:CCA TCT CAT CCC TGC GTG TCT CCG ACT CAG CCA ACC AAG AGT TTG ATC MTG GCT CAG REV: CCT ATC CCC TGT GTG CCT TGG CAG TCT CAG WTT ACC GCG GCT GCT GG	FWD:CCA TCT CAT CCC TGC GTG TCT CCG ACT CAG CCA ACC AAG AGT TTG ATC MTG GCT CAG REV: CCT ATC CCC TGT GTG CCT TGG CAG TCT CAG WTT ACC GCG GCT GCT GG	FWD:CCA TCT CAT CCC TGC GTG TCT CCG ACT CAG CCA ACC AAG AGT TTG ATC MTG GCT CAG REV: CCT ATC CCC TGT GTG CCT TGG CAG TCT CAG WTT ACC GCG GCT GCT GG
Multiplex identifier	mid		CTCACTGT	ATGGTTGC	CAACACCA	CCTTGGTT	CCGGATTA	CGAACCAT	CACAGTGT	CACTTGTC	CCAACCAA	GAACACCT	GACATCTG	GATGTGCT	GCAACCAT	GCTAATCG	GCTTGCAA	CGATCCTT	CGTTATCC	CTACACCT	TCCAAGCA	TCGAGTTG	TGACACAC	CTCACTGT	ATGGTTGC	CAACACCA	TACCGCTT	TAGGATCC	TCACACAG	GGCCTAAT	GGTAATGG	GTACACCA	AACCAACC	AACGCGAA	AATACCGC	ACACACAC	ACAGAGTG	ACTGCAGT	AGACACAG	AGAGCTCT	AGGTGATG	ATAACCGC
Adapter	adapter		FWD:CGT ATC GCC TCC CTC GCG CCA TCA REV: CTA TGC GCC TTG CCA GCC CGC TCA G
PCR conditions	pcr_cond			see O'Brien et al. (2013), Plos One	see O'Brien et al. (2013), Plos One	see O'Brien et al. (2013), Plos One	see O'Brien et al. (2013), Plos One	see O'Brien et al. (2013), Plos One	see O'Brien et al. (2013), Plos One	see O'Brien et al. (2013), Plos One	see O'Brien et al. (2013), Plos One	see O'Brien et al. (2013), Plos One	see O'Brien et al. (2013), Plos One	see O'Brien et al. (2013), Plos One	see O'Brien et al. (2013), Plos One	see O'Brien et al. (2013), Plos One	see O'Brien et al. (2013), Plos One	see O'Brien et al. (2013), Plos One	see O'Brien et al. (2013), Plos One	see O'Brien et al. (2013), Plos One	see O'Brien et al. (2013), Plos One	see O'Brien et al. (2013), Plos One	see O'Brien et al. (2013), Plos One	see O'Brien et al. (2013), Plos One	see O'Brien et al. (2013), Plos One	see O'Brien et al. (2013), Plos One	see O'Brien et al. (2013), Plos One	see O'Brien et al. (2013), Plos One	see O'Brien et al. (2013), Plos One	see O'Brien et al. (2013), Plos One	see O'Brien et al. (2013), Plos One	see O'Brien et al. (2013), Plos One	see O'Brien et al. (2013), Plos One	see O'Brien et al. (2013), Plos One	see O'Brien et al. (2013), Plos One	see O'Brien et al. (2013), Plos One	see O'Brien et al. (2013), Plos One	see O'Brien et al. (2013), Plos One	see O'Brien et al. (2013), Plos One	see O'Brien et al. (2013), Plos One	see O'Brien et al. (2013), Plos One	see O'Brien et al. (2013), Plos One
Sequencing method	sequencing_meth		GS FLX Titanium 454 pyrosequencing	GS FLX LR70 454 pyrosequencing	GS FLX LR70 454 pyrosequencing	GS FLX LR70 454 pyrosequencing	GS FLX LR70 454 pyrosequencing	GS FLX LR70 454 pyrosequencing	GS FLX LR70 454 pyrosequencing	GS FLX LR70 454 pyrosequencing	GS FLX LR70 454 pyrosequencing	GS FLX LR70 454 pyrosequencing	GS FLX LR70 454 pyrosequencing	GS FLX LR70 454 pyrosequencing	GS FLX LR70 454 pyrosequencing	GS FLX LR70 454 pyrosequencing	GS FLX LR70 454 pyrosequencing	GS FLX LR70 454 pyrosequencing	GS FLX LR70 454 pyrosequencing	GS FLX LR70 454 pyrosequencing	GS FLX LR70 454 pyrosequencing	GS FLX LR70 454 pyrosequencing	GS FLX LR70 454 pyrosequencing	GS FLX LR70 454 pyrosequencing	GS FLX LR70 454 pyrosequencing	GS FLX LR70 454 pyrosequencing	GS FLX LR70 454 pyrosequencing	GS FLX LR70 454 pyrosequencing	GS FLX LR70 454 pyrosequencing	GS FLX LR70 454 pyrosequencing	GS FLX LR70 454 pyrosequencing	GS FLX LR70 454 pyrosequencing	GS FLX LR70 454 pyrosequencing	GS FLX LR70 454 pyrosequencing	GS FLX LR70 454 pyrosequencing	GS FLX LR70 454 pyrosequencing	GS FLX LR70 454 pyrosequencing	GS FLX LR70 454 pyrosequencing	GS FLX LR70 454 pyrosequencing	GS FLX LR70 454 pyrosequencing	GS FLX LR70 454 pyrosequencing	GS FLX LR70 454 pyrosequencing
